# Supplementary material for: BRD7 inhibits tumor progression by positively regulating the p53 pathway in hepatocellular carcinoma
Source: PubMed Central journal article supplement (PMC7847651; doi:10.7150/jca.50293), 2021-01-01
Supplement: jcav12p1507s1.pdf [file jcav12p1507s1.pdf]

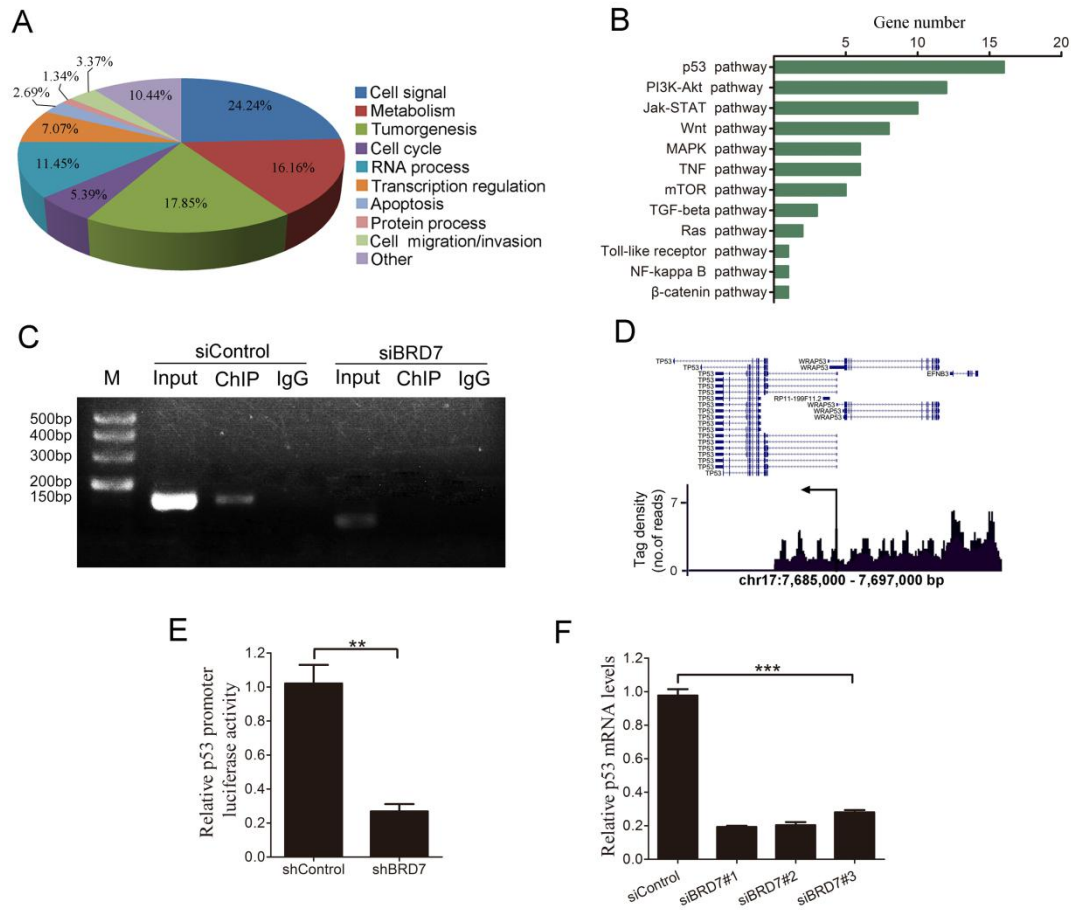

**Figure S1.** Defining genome-wide BRD7 binding genes by ChIP-sequencing in HepG2 cell lines.

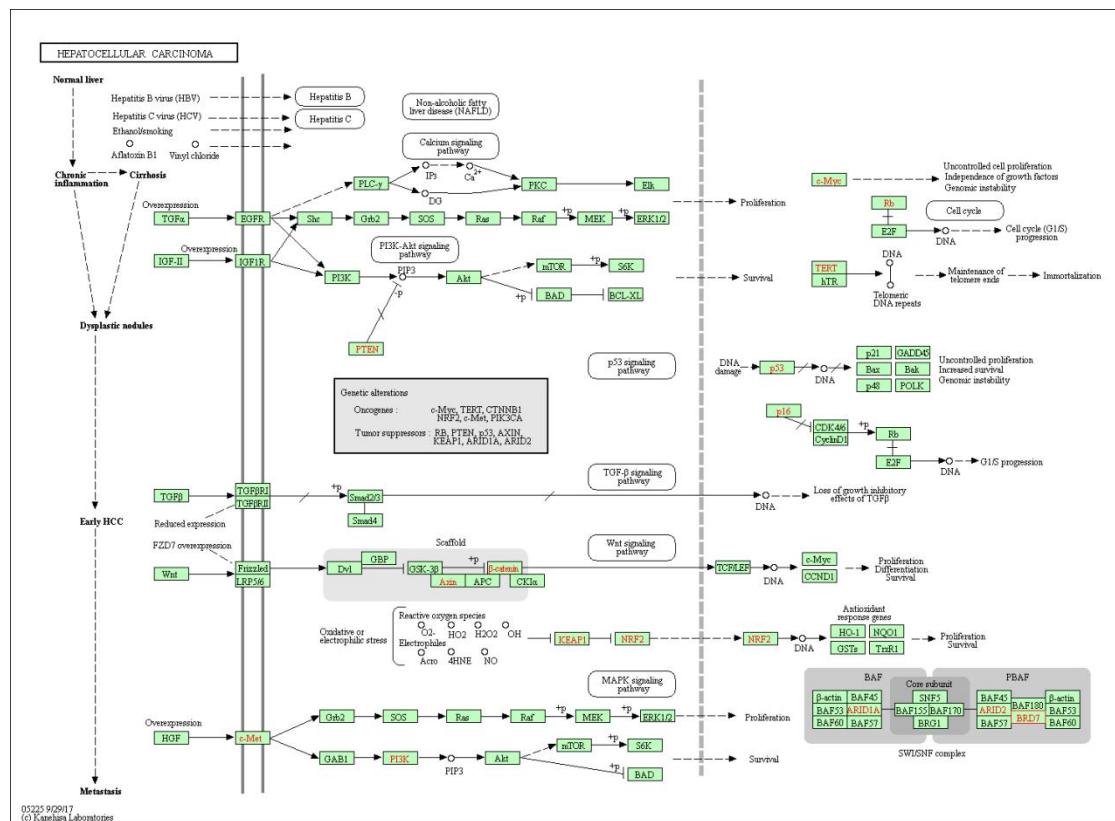

**Figure S2.** Signaling pathways in HCC, demonstrating that BRD7 is involved in the PI3K-Akt pathway (from TCGA data).

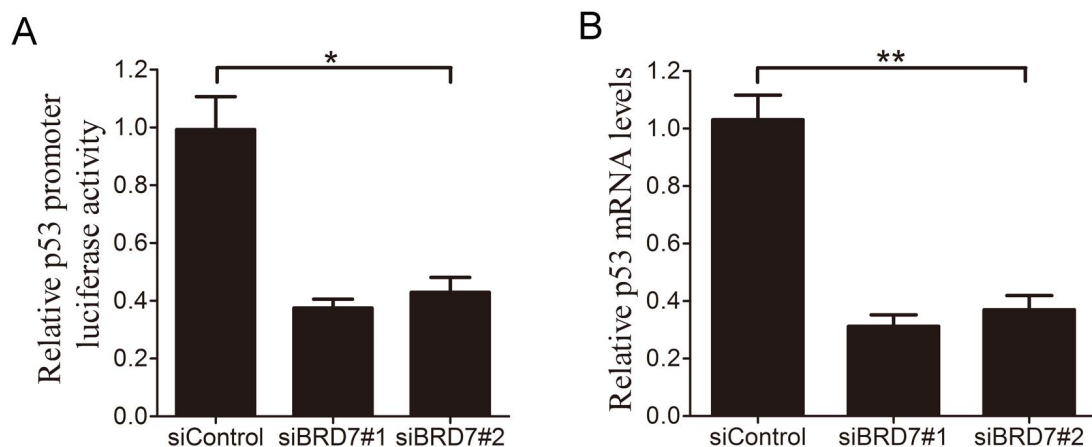

**Figure S3.** The p53 promoter luciferase activity (A) and mRNA expression (B) in Bel7402 cells with BRD7 knockdown.

---

**Table S1. Sequences of siRNA**

|                |         | <b>Sequences(5'-3')</b> |                       |
|----------------|---------|-------------------------|-----------------------|
| <b>BRD7</b>    | siRNA-1 | sense                   | GCCUCUCACAAGCUCUUUATT |
|                |         | anti-sense              | UAAAGAGCUUGUGAGAGGCTT |
|                | siRNA-2 | sense                   | GCCAAGAUUAUCCGUAUGUTT |
|                |         | anti-sense              | ACAUACGGAUAAUCUUGGCTT |
|                | siRNA-3 | sense                   | GCCCUACAGUUCUUAUGCATT |
|                |         | anti-sense              | UGCAUAAGAACUGUAGGGCTT |
| <b>P53</b>     | siRNA-1 | sense                   | CCCGGACGAUUAUGAACAATT |
|                |         | anti-sense              | UUGUUCAAUAUCGUCCGGGTT |
|                | siRNA-2 | sense                   | CCACCAUCCACUACAACUATT |
|                |         | anti-sense              | UAGUUGUAGUGGAUGGUGGTT |
|                | siRNA-3 | sense                   | GCGCACAGAGGAAGAGAAUTT |
|                |         | anti-sense              | AUUCUCUUCCUCUGUGCGCTT |
| <b>Control</b> | siRNA   | sense                   | UUCUCCGAACGUGUCACGUTT |
|                |         | anti-sense              | ACGUGACACGUUCGGAGAATT |

---
